# Supplementary material
Source: publisher figshare collection journal article supplement (https://acs.figshare.com/ndownloader/files/25762752)

**Figure S1 Structures of B-type procyanidins B1, B2, B3, and B4**

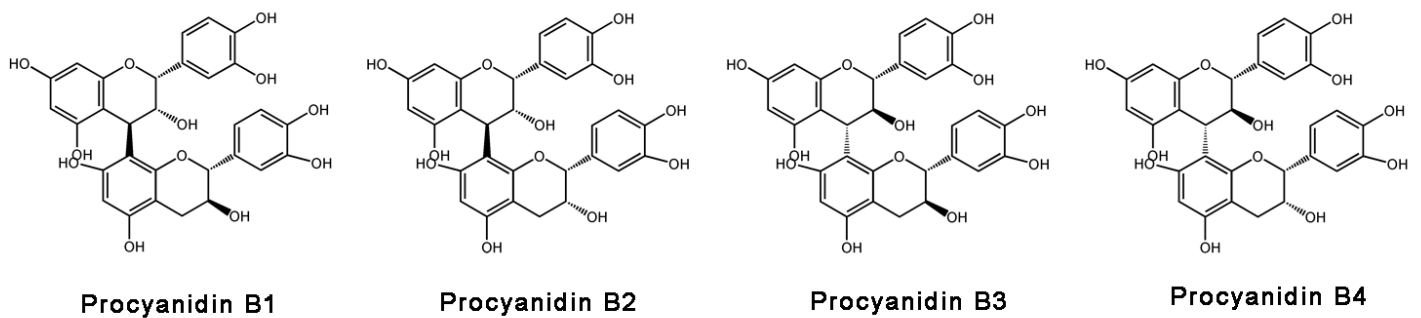

**Figure S2 SDS-PAGE gel of rCsDFRa protein.** M indicate the marker, the number 1 indicated the protein before purification and number 2 indicate the purified protein.

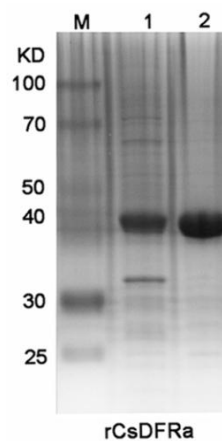

**Figure S3 DMACA staining of the extracts from *CsDFRa* transgenic tobacco flowers and control flowers.** Note, *CsLARc* transgenic tobacco was served as a positive control. EV represent empty vector control.

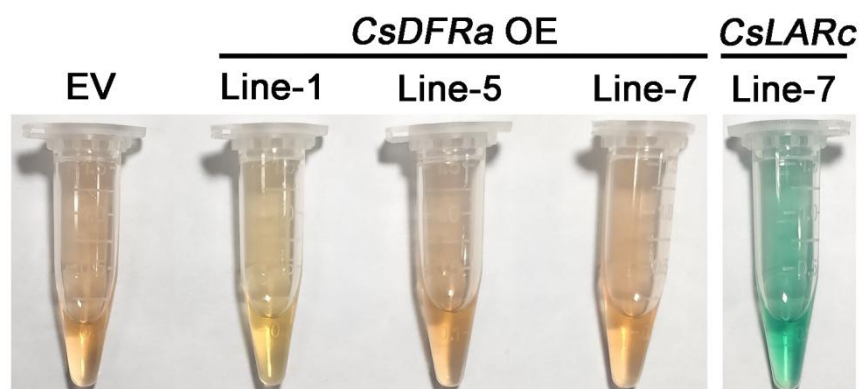

Supplement: Supplementary file 1 [file 25762752]
